# Supplementary material for: Chlamydia trachomatis enhances HPV persistence through immune modulation
Source: Springer Nature journal article supplement (doi:10.1186/s12879-024-09094-6), 2024-02-20
Supplement: MOESM2 [file 26754750]

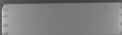

2022-08-26

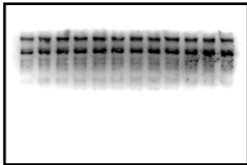

erk1/2

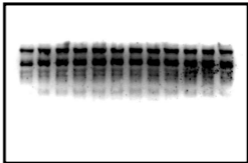

erk1/2

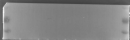

2022-08-25

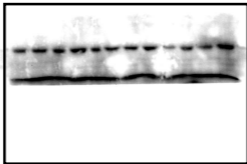

p-AKT

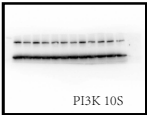

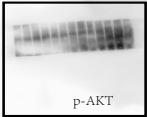

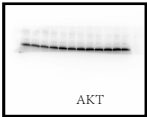



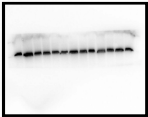

GAPDH

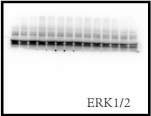

A rectangular label with a black border containing several lines of extremely blurred handwritten text. The text is illegible due to motion blur and low resolution.

MKK4 10S

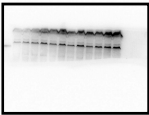

p-MKK4 10S
